# Supplementary material for: Enhanced sensing of hazardous 4-nitrophenol by a graphene oxide–TiO2 composite: environmental pollutant monitoring applications
Source: Royal Society of Chemistry journal article supplement (doi:10.1039/c9nj06176b), 2020-01-01
Supplement: c9nj06176b1.pdf [file c9nj06176b1.pdf]

***Supporting Information***

**Enhanced sensing of hazardous 4-Nitrophenol by graphene  
oxide-TiO<sub>2</sub> composite: Environmental Pollutant Monitoring  
application**

**Raja Nehru, Praveen Kumar Gopi and Shen-Ming Chen\***

Department of Chemical Engineering and Biotechnology, National Taipei University  
of Technology, Taipei 10608, Taiwan.

\*E-mail: *smchen1957@gmail.com, nrajache@gmail.com*

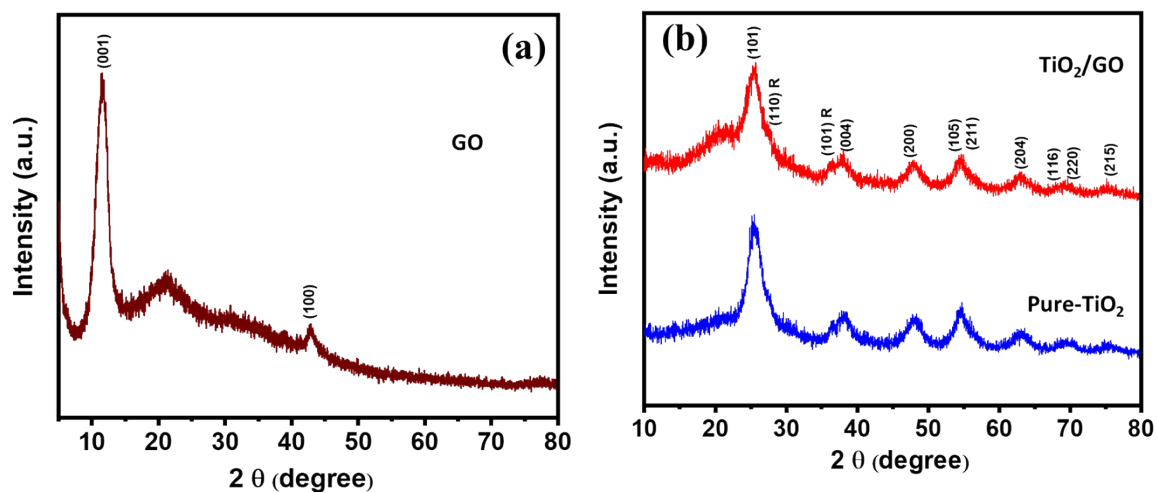

**Fig. S1.** Powder X-ray diffraction patterns of (a) GO, (b) TiO<sub>2</sub> nanoparticles and TiO<sub>2</sub>/GO nanocomposite.

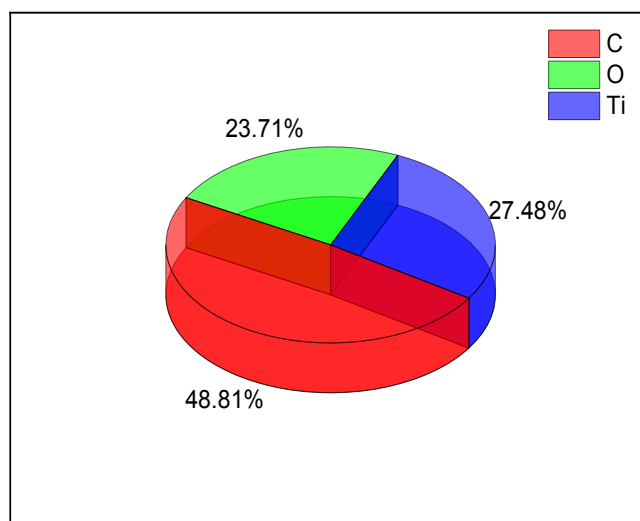

**Fig.S2.** EDS weight percentage of GO/TiO<sub>2</sub> nanocomposite.

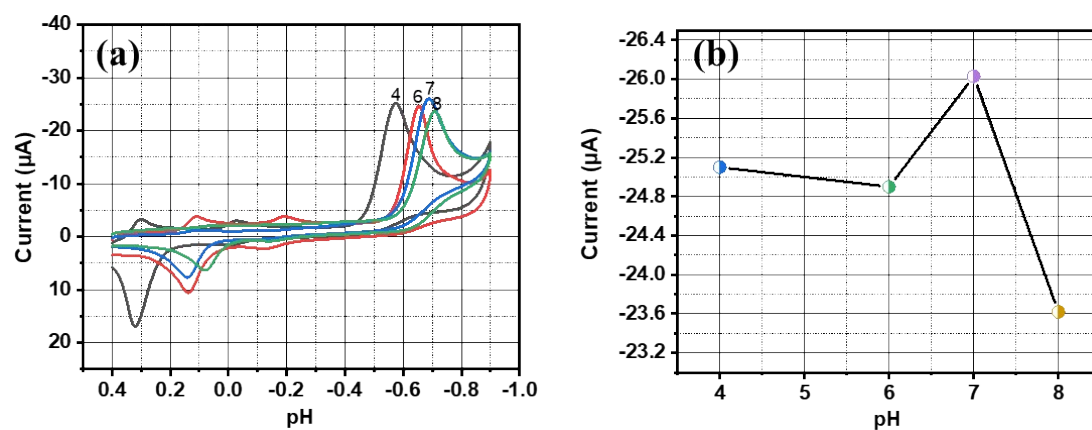

**Fig.S3. (a) CVs of the reduction of 4-NP (200  $\mu\text{M}$ ) at GO/TiO<sub>2</sub>/GCE in different pHs such as 4, 6, 7, 8 and (b) the 4-NP reduction peak current responses vs. different pHs.**

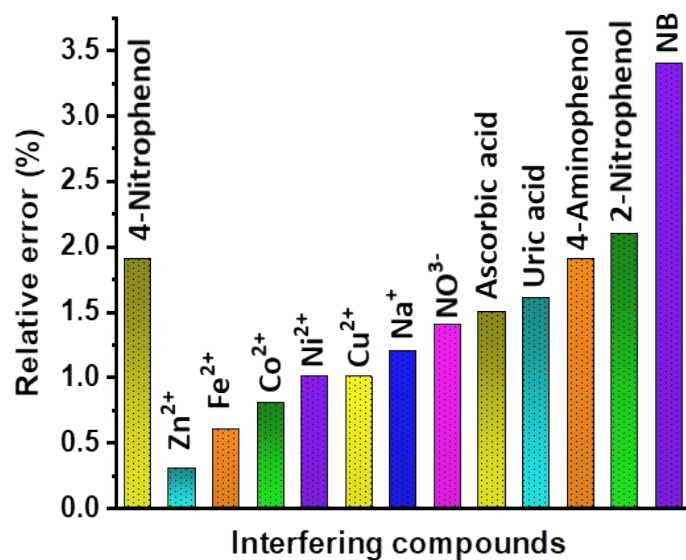

**Fig. S3. Relative error for the interfering compounds.**

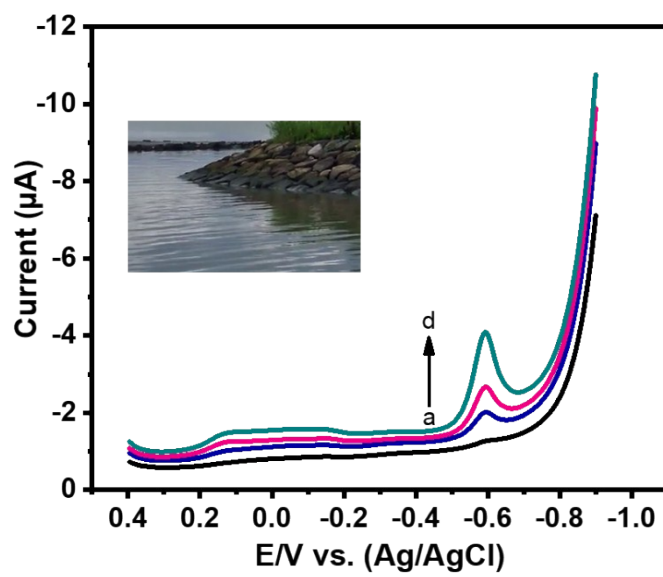

***Fig.S4.*** The real sample analysis of 4-NP in river water sample using the standard addition method.
